# Supplementary material
Source: PubMed Central journal article supplement (PMC6690681)
Supplement: supp_RA119.009087_145178_0_supp_320879_pqk65h.pdf [file supp_RA119.009087_145178_0_supp_320879_pqk65h.pdf]

## Supporting Information

### **Structural basis for substrate selectivity and nucleophilic substitution mechanisms in human adenine phosphoribosyltransferase catalyzed reaction**

Mohammad Ozeir, Jessica Huyet, Marie-Claude Burgevin, Benoît Pinson, Françoise Chesney, Jean-Marc Remy, Abdul Rauf Siddiqi, Roland Lupoli, Gregory Pinon, Christelle Saint-Marc, Jean-Francois Gibert, Renaud Morales, Irène Ceballos-Picot, Robert Barouki, Bertrand Daignan-Fornier, Anne Olivier-Bandini, Franck Augé, Pierre Nioche

#### **Table of contents:**

|             |    |
|-------------|----|
| Figure S1:  | 2  |
| Figure S2:  | 4  |
| Note S1:    | 5  |
| Figure S3:  | 6  |
| Note S2:    | 7  |
| Table S1:   | 8  |
| Figure S4:  | 9  |
| Figure S5:  | 10 |
| Figure S6:  | 11 |
| References: | 12 |

**Figure S1** : Structure-based sequence alignment of APRT from *Homo sapiens* (human), *Macaca fascicularis*, *Panthera tigris*, *Camelus ferus*, *Rattus norvegicus*, *Mus musculus*, *Danio rerio*, *Drosophila melanogaster*, *Caenorhabditis elegans*, *Saccharomyces cerevisiae*, *Arabidopsis thaliana*, *Synechocystis sp. PCC6803*, *Escherichia coli*, *Shewanella oneidensis*, *Bacillus subtilis str.168*, *Clostridioides difficile*, *Dictyostelium discoideum*, *Streptococcus pneumonia*, *Pseudomonas aeruginosa*, *Neisseria meningitides*, *Thermatoga maritima*, *Parabacteroides sp. YL27*. Secondary structures were defined using the DSSP server (1). The hood region, the flexible loop and the PRPP binding motif are indicated. The strictly conserved residues are black shadowed.

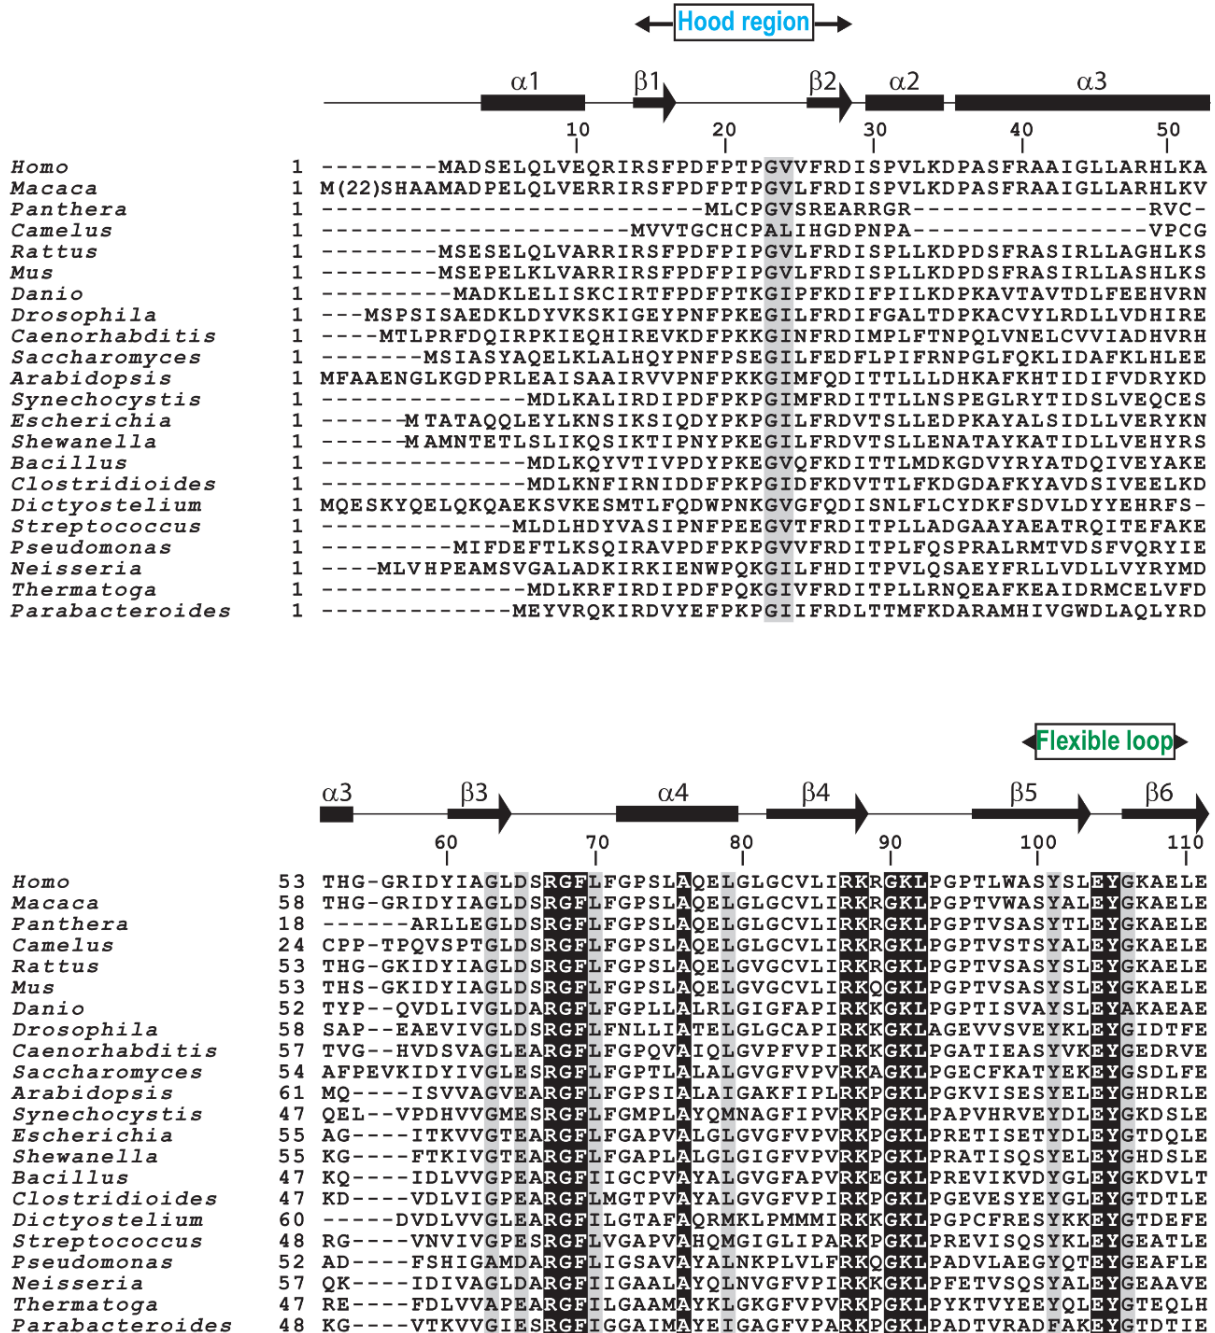

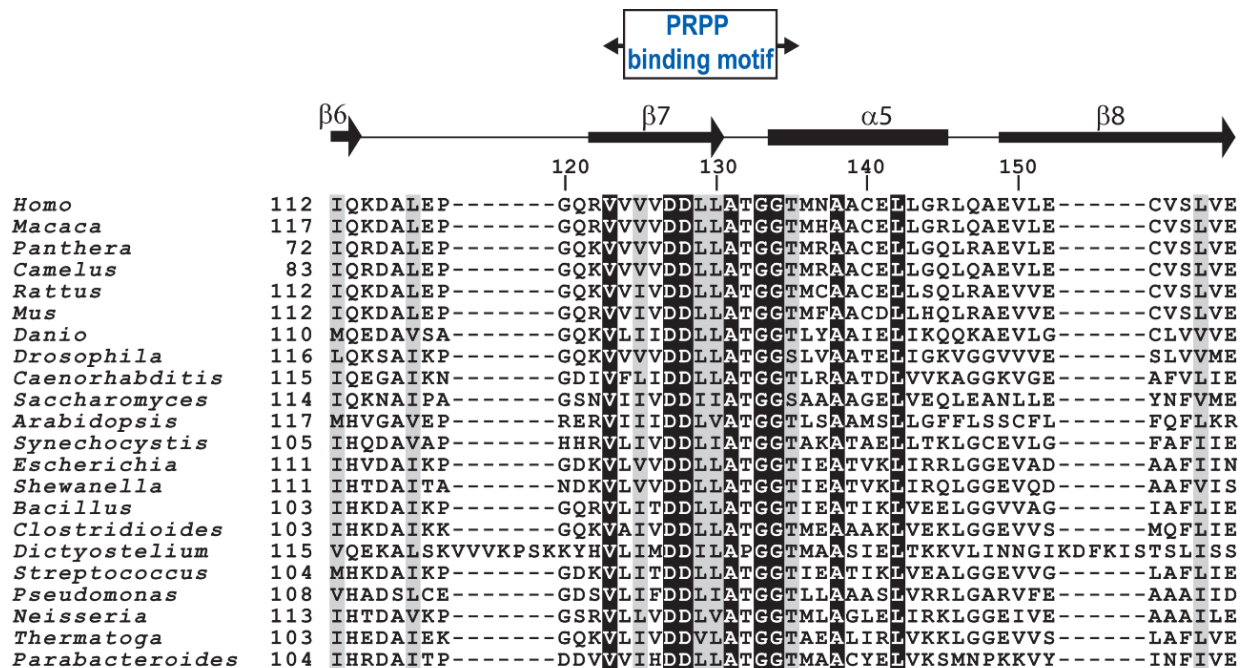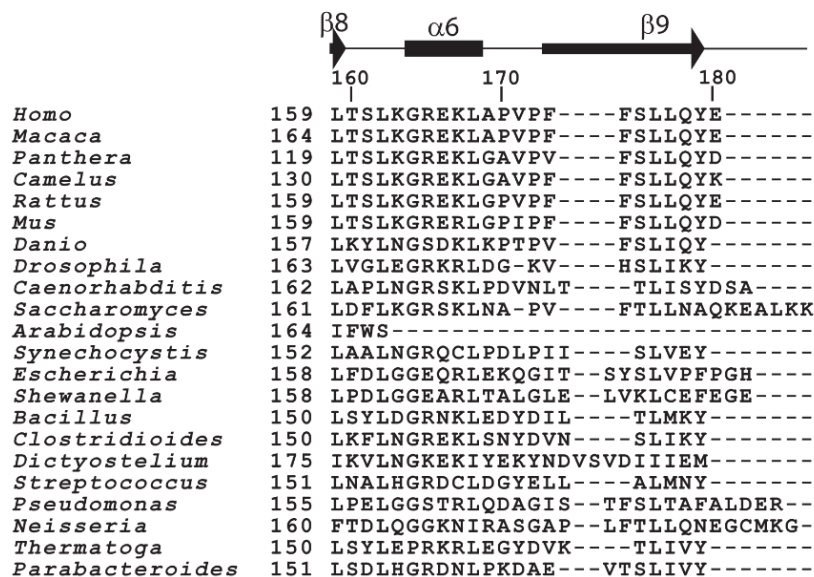

**Figure S2** : Structure of a PRPP-Mg<sup>2+</sup>-hAPRT monomer (PDB\_ID: 6FCH) showing the hood region (cyan), the flexible loop (green) and the PRPP binding motif (blue). The strictly conserved residues shown in Figure S1 are illustrated in pink. The PRPP molecule, in orange, point to the position of the active site.

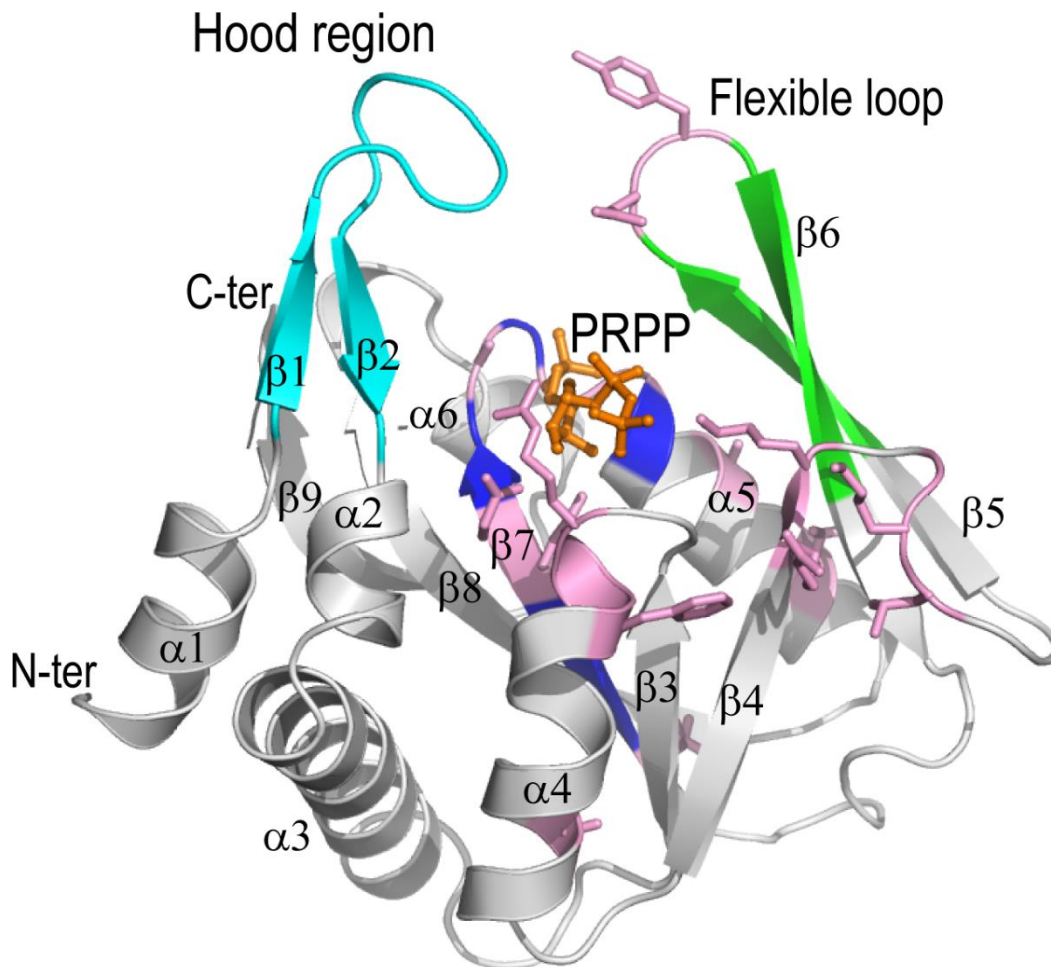

**Supporting Note S1** : In all of the structures reported here, the ligand occupancies were estimated by 1) inspecting the OMIT map Fo-Fc electron density; 2) comparing the ligand B-factors to the surrounding amino acids B-factors; 3) calculating the RSCC (Real Space Correlation Coefficient), RSR (Real Space R-value) and LLDF (Local Ligand Density Fit) values (2). Then, the estimated occupancy values were based on a continuous electron density map calculated at  $3\sigma$ , comparable B-factors for both ligands and surrounding amino acids, low RSR, high RSCC ( $> 0.90$ ) values and LLDF values near or lower than 2.

**Figure S3** : Interaction of AMP in the hAPRT active site (PDB\_ID: 6FCL).

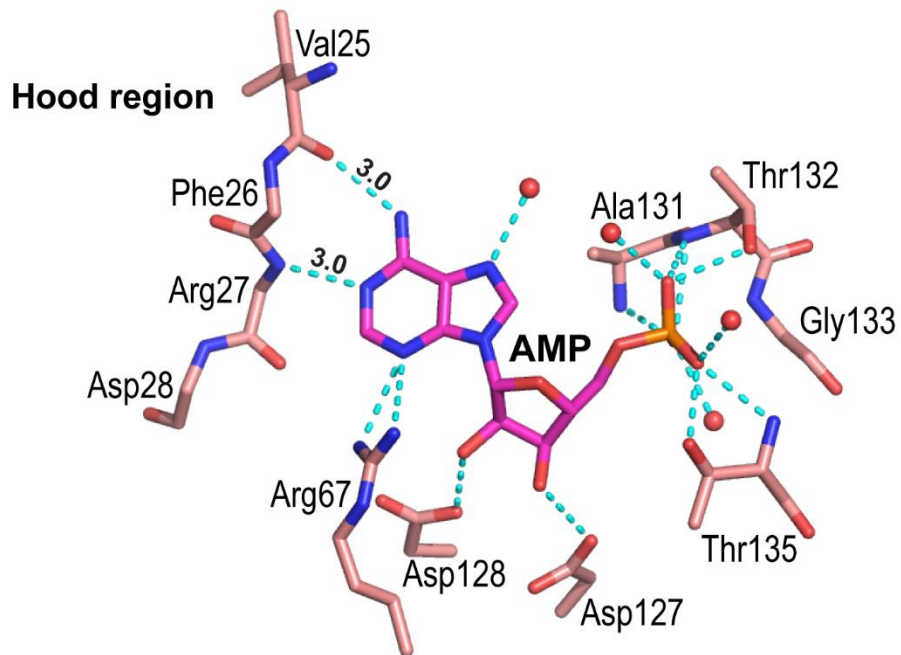

**Supporting Note S2:** Details on the possible  $S_N2$  pathways. a) A two-step anionic  $S_N2$  pathway: The first step is a shift of the hydrogen on the purine/N7 position to Glu104. The resulting negative charge on the purine is transferred from position N7 to N9, which favors the nucleophilic attack toward the C1' position of PRPP in a second step, which leads to the formation of the nucleotide and a pyrophosphate that inherits the negative charge initially carried by Glu104; b) A one-step neutral pathway: A concerted pathway where the proton shift and the nucleophilic attack occur simultaneously, the negative charge of Glu104 is transferred directly to the pyrophosphate without the formation of any intermediate; c) A two-step cationic  $S_N2$  pathway: The nucleophilic attack of the purine/N9 nitrogen towards the C1' position of PRPP is the first event, which leads to the formation of a pyrophosphate and a nucleotide protonated on its N7 position. This positively charged nucleotide intermediate transfers its proton to Glu104 in a second step.

**Table S1:** Comparison of the magnesium ion geometry in human APRT wild type and variant structures.

The atom configuration is indicated in the figure below. The values discussed are indicated in red.

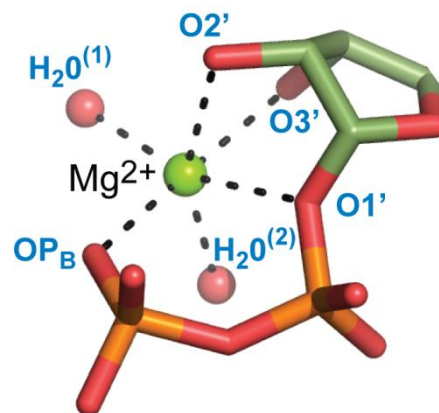

|                                                               | Hx-PRPP-<br>hAPRT <sup>wt</sup> | ADE-<br>PRPP-<br>hAPRT <sup>wt</sup> | PRPP-<br>hAPRT <sup>wt</sup> | ADE-PRPP-<br>Mg <sup>2+</sup> -<br>hAPRT <sup>Y105F</sup> -<br>14days<br>(14 days)<br>(mol A, with<br>AMP) | ADE-PRPP-<br>Mg <sup>2+</sup> -<br>hAPRT <sup>Y105F</sup> -<br>14days<br>(14 days)<br>(mol B, with<br>PRPP) | ADE-PRPP-<br>Mg <sup>2+</sup> -<br>hAPRT <sup>Y105F</sup> -<br>30days<br>(30 days)<br>(mol B, with<br>AMP) |
|---------------------------------------------------------------|---------------------------------|--------------------------------------|------------------------------|------------------------------------------------------------------------------------------------------------|-------------------------------------------------------------------------------------------------------------|------------------------------------------------------------------------------------------------------------|
| PDB_ID                                                        | 6HGQ                            | 6FCI                                 | 6FCH                         | 6FD5                                                                                                       | 6FD5                                                                                                        | 6FD6                                                                                                       |
| References                                                    | This work                       | (3)                                  | (3)                          | (3)                                                                                                        | (3)                                                                                                         | (3)                                                                                                        |
| <b>Bond distance (Å)</b>                                      |                                 |                                      |                              |                                                                                                            |                                                                                                             |                                                                                                            |
| O1'-Mg <sup>2+</sup>                                          | 2.2                             | 2.2                                  | 2.4                          | 1.8                                                                                                        | 2.3                                                                                                         | 1.7                                                                                                        |
| O2'-Mg <sup>2+</sup>                                          | 2.1                             | 2.1                                  | 2.4                          | 2.7                                                                                                        | 2.4                                                                                                         | 2.8                                                                                                        |
| O3'-Mg <sup>2+</sup>                                          | 2.2                             | 2.3                                  | 2.3                          | 2.2                                                                                                        | 2.4                                                                                                         | 2.2                                                                                                        |
| OP <sub>B</sub> -Mg <sup>2+</sup>                             | 2.0                             | 2.0                                  | 2.2                          | 2.2                                                                                                        | 2.2                                                                                                         | 2.2                                                                                                        |
| H <sub>2</sub> O(1)-Mg <sup>2+</sup>                          | 2.1                             | 2.1                                  | 2.3                          | 2.3                                                                                                        | 2.4                                                                                                         | 2.2                                                                                                        |
| H <sub>2</sub> O(2)-Mg <sup>2+</sup>                          | 2.1                             | 2.1                                  | 2.1                          | 2.3                                                                                                        | 2.1                                                                                                         | 2.5                                                                                                        |
| <b>Angle between atoms (°)</b>                                |                                 |                                      |                              |                                                                                                            |                                                                                                             |                                                                                                            |
| O1'-Mg <sup>2+</sup> -O2'                                     | 75                              | 74                                   | 69                           | 79                                                                                                         | 72                                                                                                          | 80                                                                                                         |
| O1'-Mg <sup>2+</sup> -O3'                                     | 84                              | 84                                   | 78                           | 88                                                                                                         | 82                                                                                                          | 86                                                                                                         |
| O2'-Mg <sup>2+</sup> -O3'                                     | 78                              | 75                                   | 71                           | 63                                                                                                         | 70                                                                                                          | 64                                                                                                         |
| O1'-Mg <sup>2+</sup> -H <sub>2</sub> O(2)                     | 89                              | 87                                   | 91                           | 92                                                                                                         | 85                                                                                                          | 80                                                                                                         |
| O1'-Mg <sup>2+</sup> -OP <sub>B</sub>                         | 95                              | 94                                   | 95                           | 95                                                                                                         | 95                                                                                                          | 91                                                                                                         |
| H <sub>2</sub> O(1)-Mg <sup>2+</sup> -O2'                     | 97                              | 106                                  | 96                           | 110                                                                                                        | 93                                                                                                          | 110                                                                                                        |
| H <sub>2</sub> O(1)-Mg <sup>2+</sup> -O3'                     | 87                              | 92                                   | 89                           | 93                                                                                                         | 88                                                                                                          | 95                                                                                                         |
| H <sub>2</sub> O(1)-Mg <sup>2+</sup> -<br>H <sub>2</sub> O(2) | 97                              | 92                                   | 102                          | 78                                                                                                         | 107                                                                                                         | 90                                                                                                         |
| H <sub>2</sub> O(1)-Mg <sup>2+</sup> -OP <sub>B</sub>         | 93                              | 89                                   | 96                           | 84                                                                                                         | 96                                                                                                          | 87                                                                                                         |



**Figure S4** : Octahedral coordination of the magnesium ion in the ADE-PRPP-hAPRT<sup>Y105F-14days</sup> complex structure 14 days post-crystallization (first subunit) (3).

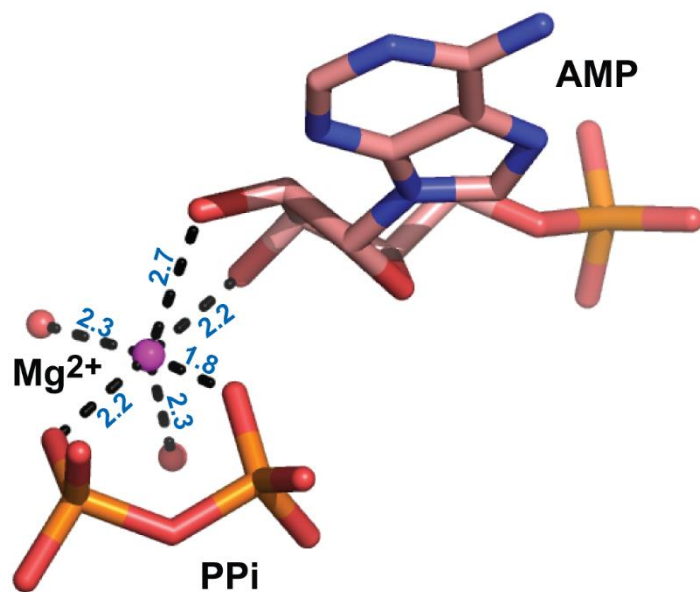

**Figure S5** : Superimposition of both molecules of the asymmetric unit in the ADE-PRPP-Mg<sup>2+</sup>-hAPRT<sup>Y105F-14days</sup> variant structure showing the displacement of the magnesium ion. The magnesium ion in the ADE-PRPP-Mg<sup>2+</sup>-hAPRT<sup>Y105F-30days</sup> second subunit is not shown for clarity but superimposes to the ion colored in magenta (3).

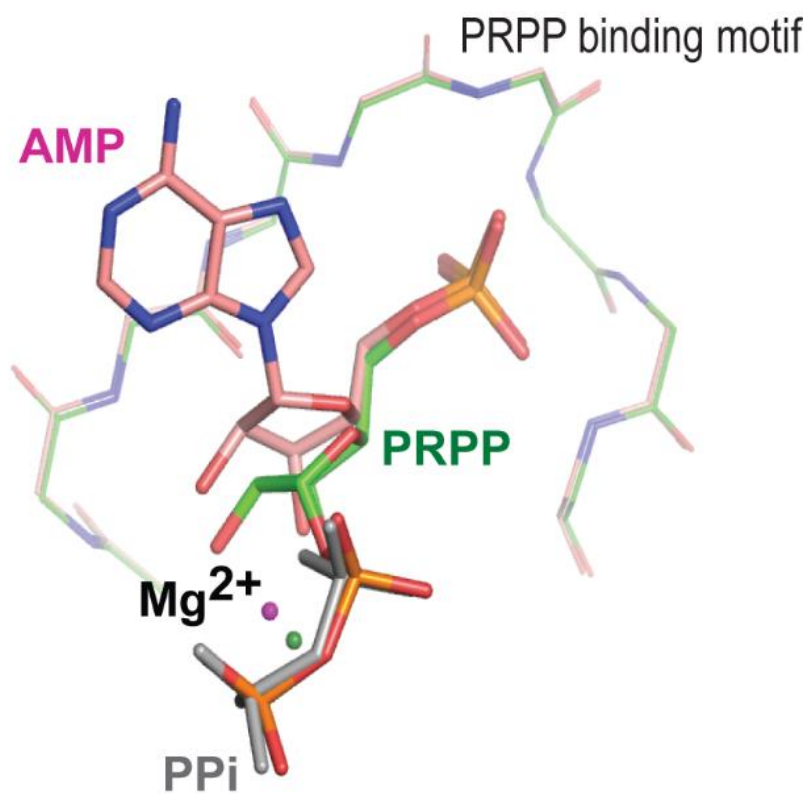

**Figure S6 :** Superimposition of AMP-hAPRT<sup>wt</sup> (magenta) onto the first subunit of ADE-PRPP-Mg<sup>2+</sup>-hAPRT<sup>Y105F-14days</sup> structure (cyan), which showed the formation of the products AMP and PPI *in crystallo* (3).

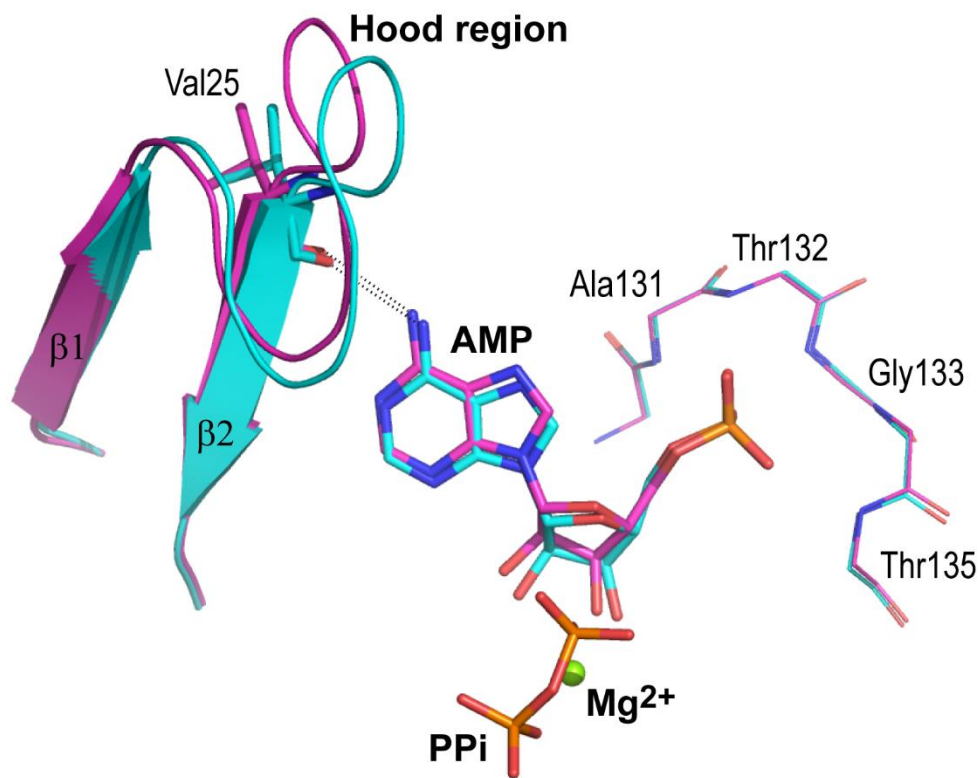

## REFERENCES:

1. Kabsch, W., and Sander, C. (1983) Dictionary of protein secondary structure: pattern recognition of hydrogen-bonded and geometrical features. *Biopolymers*. **22**, 2577–2637
2. Deller, M. C., and Rupp, B. (2015) Models of protein–ligand crystal structures: trust, but verify. *J. Comput. Aided Mol. Des.* **29**, 817–836
3. Huyet, J., Ozeir, M., Burgevin, M.-C., Pinson, B., Chesney, F., Remy, J.-M., Siddiqi, A. R., Lupoli, R., Pinon, G., Saint-Marc, C., Gibert, J.-F., Morales, R., Ceballos-Picot, I., Barouki, R., Daignan-Fornier, B., Olivier-Bandini, A., Augé, F., and Nioche, P. (2018) Structural Insights into the Forward and Reverse Enzymatic Reactions in Human Adenine Phosphoribosyltransferase. *Cell Chem. Biol.* **25**, 666-676.e4
